# Supplementary material for: Chronological Classification of Ancient Mortars Employing Spectroscopy and Spectrometry Techniques: Sagunto (Valencia, Spain) Case
Source: Hindawi journal article supplement (doi:10.1155/2018/9736547), 2018-01-01
Supplement: f1 [file 9736547.f1.xlsx]

## Sheet: Annex 1
Sample	Al2O3	SiO2	CaO	Fe	Ti
C05	0.656627	18.7416	40.7275	0.89695	0.07415
C06	0.748315	21.9477	38.4879	1.01985	0.07765
C07	0.846904	25.9524	38.4607	1.11375	0.07725
C08	0.736444	25.4146	37.7722	1.2378	0.09515
C09	0.671061	23.5568	34.4289	1.074	0.09685
C10a	0.667557	26.9735	37.4427	1.0261	0.08715
C10b	0.730793	14.68	42.4115	0.89465	0.07255
C20	0.833104	25.0598	38.5853	1.0231	0.09
C26	0.725229	14.8146	42.8404	0.95565	0.0696
CLC	0.755785	11.2965	46.2923	0.8503	0.06135
R1a	10.0742	36.993	16.4816	2.21375	0.2335
R1b	11.2352	41.0082	14.8464	2.4509	0.23895
R1c	10.2559	36.2713	15.9021	2.35397	0.2507
R2a	12.5318	38.6266	13.9783	2.85765	0.28975
R2b	11.288	36.4709	14.3007	2.72735	0.2665
R2d	9.71414	37.5874	16.5765	2.21985	0.2348
R3a	0.949237	21.3119	40.8434	1.24965	0.1052
R3b	0.769058	19.265	34.7266	1.11585	0.0802
JMN	0.920062	22.4212	37.215	1.03625	0.0828
EM	0.830125	18.3118	42.1303	1.0116	0.078
NW	1.00825	22.818	37.429	1.1084	0.0936
NR	0.608767	14.5751	40.948	0.8505	0.061
P15	0.648501	17.1853	45.3537	0.8109	0.0475
P16	0.575255	19.1948	42.2461	0.77915	0.0524
P17	0.726149	18.6354	42.8269	0.86705	0.06265
P18	0.564894	18.6994	42.7055	0.78725	0.06
UN1	0.722403	22.3093	41.7552	0.94015	0.0759
UN2	0.824737	23.7346	39.1212	1.0633	0.08865
WLL	1.04796	21.5558	34.8693	1.1152	0.0901
RS10A	0.582144	24.3674	32.8076	1.11705	0.10605
RS10B	0.65086	23.1054	33.2317	1.41112	0.115725
RS10C	0.772418	24.5742	31.7504	1.43875	0.127875
RS11A	0.582686	22.4716	33.9035	1.2782	0.11315
RS11B	0.617781	25.4162	34.4238	1.2707	0.1104
RS11C	5.0703	36.7242	18.9666	1.4352	0.1332
RS24A	0.63738	22.8783	34.1442	1.29543	0.1062
RS24B	0.701564	21.6493	32.3856	1.37315	0.110075
RS24C	0.43615	17.5496	27.3354	1.30402	0.10955
RS25A	3.02106	34.8573	26.7464	1.5015	0.144
RS25B	0.62047	23.3799	31.4224	1.50565	0.119
RS25C	0.720823	20.2472	33.7861	1.27805	0.108075
RSLW	0.568892	25.8849	28.788	1.1852	0.10245
Note: Concentration of elements expressed as wt%.

## Sheet: Annex 2
Sample	La	Ce	Pr	Nd	Sm	Eu	Gd	Tb	Dy	Ho	Er	Tm	Yb	Lu	∑REE	Bi	Pb	Tl	Ba	Cd	Mo	Y	Sr	Zn	Cu	Ni	Co	Mn	Cr	V	Sc	Li
C05	3.2007	4.74257	0.652433	2.91655	0.617317	0.140956	0.554301	0.0833546	0.43577	0.0808217	0.21791	0.0282121	0.167315	0.0245709	13.8628	0.0555905	19.3213	0.0278682	56.7959	0.244259	0.332458	3.02726	302.444	17.9104	9.09908	5.60832	3.22602	197.511	5.0226	7.6231	0.84359	3.34001
C06	4.35351	6.45803	0.895605	3.99037	0.817234	0.184594	0.730863	0.10251	0.513063	0.0919061	0.244344	0.0315494	0.18328	0.0268392	18.6237	0.0298357	3.42482	0.019743	49.7654	0.0606621	0.219253	3.47096	203.958	5.33407	5.65582	5.56296	3.3772	214.623	4.90917	7.0606	0.898155	2.88472
C07	4.74285	7.2241	1.03778	4.57338	0.937073	0.209024	0.817975	0.116463	0.590582	0.106762	0.281517	0.0359479	0.210542	0.0305448	20.9145	0.0438565	6.96672	0.0236537	37.46	0.229623	0.232765	3.89179	191.882	4.7105	5.13406	6.3334	4.2105	204.614	4.73573	5.87027	1.02138	3.70621
C08	4.55877	6.91557	0.980496	4.28515	0.884401	0.199729	0.748556	0.10439	0.534185	0.0933707	0.253022	0.0321404	0.186062	0.0272856	19.8031	0.0404293	5.83423	0.028519	76.5465	0.105061	0.371965	3.69335	200.141	19.3699	7.54527	6.40876	5.43264	570.549	5.00098	6.71861	0.994485	3.99095
C09	4.89702	6.39764	1.00896	4.52821	0.909713	0.207329	0.847618	0.119377	0.601043	0.108236	0.28531	0.0367351	0.208342	0.0306084	20.1861	0.0426181	6.88538	0.0195415	43.1613	0.106572	0.328343	4.20271	203.657	10.9965	14.067	6.59177	4.05979	181.475	5.7631	11.6711	1.14014	3.77032
C10a	4.29928	6.31478	0.899038	3.95717	0.824114	0.181215	0.747474	0.105912	0.543516	0.0964421	0.260288	0.0323785	0.186581	0.027235	18.4754	0.033465	10.8056	0.0181636	43.0951	0.604361	0.366422	4.01125	229.442	16.111	10.9226	6.64595	3.74667	221.604	4.96021	9.25478	1.04775	4.12747
C10b	4.97015	6.49292	1.01755	4.47029	0.898062	0.203184	0.827136	0.116292	0.622257	0.113698	0.308575	0.0396085	0.228627	0.0334974	20.3419	0.027546	5.44263	0.00974356	75.966	0.131018	0.395814	4.54955	258.208	4.02484	6.31424	10.5692	4.2771	532.782	4.80736	10.5701	1.05574	3.3679
C20	6.04146	8.89153	1.21953	5.20606	1.00696	0.220915	0.850741	0.111609	0.563196	0.0975349	0.26472	0.0327332	0.186376	0.0273625	24.7207	0.045077	25.2437	0.0241173	71.4489	0.0605114	0.244883	3.82432	177.347	8.76824	7.65282	7.39784	2.8846	216.723	5.11989	9.95557	1.14636	4.72381
C26	4.57671	5.83077	0.95404	4.2952	0.900828	0.212134	0.914514	0.127364	0.687789	0.125594	0.337587	0.0420853	0.253503	0.0392798	19.2974	0.0389042	32.1328	0.00736204	45.2955	0.0246793	0.245253	4.05915	204.571	2.26578	5.89085	14.5959	3.27592	165.593	5.76028	29.1036	0.907319	2.66981
CLC	4.07405	5.167	0.829605	3.73965	0.801029	0.189969	0.764997	0.113941	0.610765	0.117844	0.321008	0.0412781	0.238142	0.0364186	17.0457	0.0222385	29.7115	0.024608	79.5778	0.100573	0.324998	4.48342	576.75	20.4934	19.3406	10.3481	3.22597	374.103	4.37129	0.772295	1.0474	5.7183
EW	3.84346	5.48093	0.817833	3.72277	0.795435	0.183836	0.715713	0.101233	0.519448	0.0957769	0.258347	0.0321982	0.188998	0.0289416	16.7849	0.042161	46.0504	0.0209201	63.0189	0.105858	0.252497	3.27838	317.376	14.2154	14.6305	9.8632	3.24715	209.47	4.87609	2.49069	1.016	6.55978
JMN	5.25258	8.04365	1.10392	4.90123	0.991126	0.225466	0.883491	0.119751	0.604031	0.108146	0.291775	0.0377515	0.217246	0.0323011	22.8125	0.0976492	11.0525	0.0197527	50.1611	0.100324	0.127778	3.76725	194.676	12.5883	12.6096	9.73519	3.35389	176.053	5.04876	2.01773	1.18731	7.537
NR	4.92974	6.90027	1.00088	4.46182	0.883074	0.205474	0.84603	0.119821	0.637354	0.116342	0.314073	0.040262	0.2337	0.0349702	20.7238	0.0275369	42.469	0.015267	42.7856	0.0721569	0.219958	4.26376	221.308	11.8136	7.00582	10.2063	3.2569	180.646	4.9113	4.01418	1.09296	6.04229
NW	6.30966	11.0428	1.30115	5.4513	1.0773	0.243412	0.904208	0.121025	0.597693	0.103444	0.279171	0.0358898	0.21533	0.0316553	27.714	0.0695873	9.46169	0.0520829	69.5236	0.367527	0.187597	4.01583	171.946	11.3173	7.72938	9.40527	6.72426	231.323	8.54807	13.2955	1.82604	5.57017
P15	4.88419	6.2006	0.949387	4.14935	0.829092	0.189161	0.747405	0.104391	0.561204	0.103449	0.280645	0.0355476	0.202909	0.0293724	19.2667	0.0259548	7.92352	0.0147291	42.3247	0.180647	0.165937	5.01822	222.611	7.49566	4.89511	6.68098	2.93557	287.516	4.24968	8.97377	0.947647	3.47756
P16	5.70583	6.62347	1.0438	4.657	0.890446	0.206642	0.851665	0.118304	0.618953	0.115339	0.310232	0.0389775	0.220189	0.0317647	21.4326	0.0276829	4.86064	0.0146715	28.5479	0.253335	0.100613	5.58955	200.335	2.91652	4.22915	7.16784	3.36526	172.791	3.8205	8.59778	0.999375	3.65833
P17	5.69114	6.91297	1.09329	4.82829	0.96099	0.217522	0.905376	0.126215	0.665797	0.120773	0.330326	0.0416216	0.232559	0.033547	22.1604	0.0316467	19.8626	0.0124626	33.0848	0.107725	0.172025	5.75527	195.408	4.72466	5.43336	8.18209	3.67777	216.531	4.27574	14.2047	1.12247	3.53637
P18	5.16907	6.46779	1.00428	4.43425	0.902714	0.20614	0.849896	0.119545	0.627118	0.116011	0.315156	0.0401378	0.233717	0.0352172	20.521	0.0281609	14.9254	0.00958602	33.0997	0.0753992	0.15772	5.0438	248.211	8.93458	3.89233	7.77064	3.20314	174.786	3.95445	13.2012	1.06389	3.23546
R1a	7.31751	13.4057	1.75839	8.0076	1.76578	0.391959	1.66993	0.227145	1.17937	0.204697	0.545788	0.069928	0.406685	0.0605811	37.0111	0.110707	74.4432	0.0594715	64.5118	0.0755596	0.395572	6.29038	231.907	25.6434	24.7074	16.2454	5.79733	295.531	12.0286	18.1997	2.19641	12.0074
R1b	8.86483	15.8175	1.99226	8.95224	1.99853	0.432089	1.83654	0.249061	1.27247	0.225844	0.596847	0.0764134	0.452874	0.0665787	42.8341	0.141278	7.96637	0.078572	79.4139	0.0637829	0.520088	5.9971	229.551	26.9924	27.8525	17.0959	6.35865	375.053	13.5498	21.2909	2.56806	13.554
R1c	11.1086	18.4626	2.55091	11.5657	2.53072	0.570689	2.45469	0.338576	1.758	0.311319	0.850922	0.108275	0.645446	0.0932276	53.3497	0.213558	5.10023	0.0964275	88.5576	0.127664	0.731997	9.50895	342.746	36.4792	32.7313	22.9535	8.24264	438.879	16.6843	31.1052	3.19719	14.8925
R2a	10.5274	20.3881	2.51224	11.1527	2.40772	0.517216	2.14747	0.291709	1.466	0.250359	0.654077	0.0814442	0.487673	0.0716112	52.9558	0.190327	102.998	0.108024	109.922	0.06571	0.613933	6.6205	272.993	43.1996	40.2056	19.2806	8.85037	453.536	18.3414	24.7855	3.19821	19.7384
R2b	10.6291	20.5874	2.47914	10.9276	2.29716	0.503535	2.09066	0.284367	1.42216	0.238975	0.623669	0.0790167	0.482563	0.0710569	52.7165	0.210709	67.4118	0.107561	125.515	0.0828177	0.631072	6.26432	257.236	43.1349	33.8413	20.0635	9.43574	398.262	19.6441	27.5962	2.29912	20.9492
R2d	7.94656	14.4327	1.83668	8.18641	1.76975	0.379332	1.60651	0.217778	1.10915	0.188065	0.498357	0.0630185	0.368169	0.0542865	38.6567	0.146426	77.8834	0.0695146	70.8802	0.0467828	0.429116	5.17388	221.053	21.2787	23.1169	15.4831	6.02621	323.254	12.9714	22.1819	2.29912	13.0714
R3a	5.02805	6.74669	1.067	4.81169	1.00401	0.240178	0.971785	0.135999	0.722239	0.135394	0.360001	0.0462513	0.262315	0.039725	21.5713	0.0447183	26.9699	0.0100577	41.5688	0.0519546	0.268062	4.39638	192.148	6.56106	5.46707	11.8448	3.65172	172.474	7.3172	11.5979	1.54039	7.82491
R3b	4.31873	7.68765	0.972995	4.21308	0.889069	0.203268	0.812296	0.11639	0.61874	0.114001	0.314587	0.0415738	0.240309	0.0363469	20.579	0.0776973	151.664	0.0285863	48.4256	0.00275349	0.359794	3.42343	180.853	8.23279	10.2083	10.3153	4.4486	166.678	7.28859	13.9509	1.5528	6.03427
UN1	2.90921	4.18878	0.650943	2.96819	0.660176	0.159074	0.641515	0.0911998	0.475495	0.0860838	0.230739	0.0295892	0.176315	0.0260236	13.2933	0.0595167	5.75953	0.0121209	40.8937	0.0168754	0.217439	2.73379	197.207	5.59306	5.10319	8.98914	2.93584	148.903	5.21013	4.82937	0.957422	4.84215
UN2	3.98902	6.21654	0.875378	3.89946	0.845952	0.197156	0.791612	0.114579	0.599344	0.110499	0.302345	0.0378747	0.226646	0.033325	18.2397	0.0226742	7.58745	0.0113417	42.2988	0.0701982	0.0919821	3.69432	201.464	3.52268	6.42764	10.1026	3.34616	210.44	4.88374	5.19383	1.05677	5.26805
WL	6.37832	11.3413	1.34021	5.75206	1.1099	0.258711	0.934801	0.127256	0.644147	0.11416	0.310808	0.0422517	0.252459	0.037915	28.6443	0.049736	26.2241	0.041184	51.1622	0.0300168	0.183603	3.30541	194.114	5.80662	5.41025	10.1168	4.26433	175.245	8.32945	9.3871	1.72464	7.75896
RS10A	3.84398	6.10146	0.863606	3.98386	0.879753	0.205373	0.813317	0.11239	0.588601	0.103677	0.272134	0.0340809	0.206118	0.0304597	18.0388	0.0841984	7.70318	0.0936419	62.7662	0.0325986	0.426037	3.17666	258.941	11.7856	7.26399	6.41136	2.67168	180.131	5.02703	3.59962	1.08502	3.78313
RS10B	3.99444	6.38148	0.93412	4.36588	0.981043	0.218499	0.917423	0.129582	0.685499	0.12158	0.317837	0.0398704	0.241404	0.0347775	19.3634	0.106633	9.62043	0.0751174	57.3198	0.105785	0.445872	3.46183	202.391	12.2055	15.6104	6.0525	2.67362	175.338	4.6398	3.2671	0.994335	3.23643
RS10C	4.13325	6.91673	0.994866	4.62265	1.0227	0.229469	0.951443	0.132665	0.693159	0.121312	0.315121	0.0401408	0.243918	0.035796	20.4532	0.126611	12.7599	0.0651482	49.673	0.0833651	0.428825	3.11392	166.595	10.0779	5.91159	5.51508	2.37307	158.101	4.14527	2.41638	0.865077	2.91409
RS11A	3.86232	6.38999	0.935682	4.34166	0.957989	0.217387	0.892478	0.123524	0.644459	0.114507	0.296529	0.0374081	0.229842	0.0333888	19.0772	0.0921704	9.91517	0.0552831	49.2812	0.036617	0.361789	2.96218	253.445	7.72523	4.70777	5.16524	2.15525	167.394	3.91992	2.74006	0.827556	2.745
RS11B	3.91944	6.10662	0.896099	4.26175	0.968038	0.225147	0.884086	0.124434	0.659851	0.117114	0.310762	0.0386208	0.240298	0.0359698	18.7882	0.0973756	10.6555	0.0502508	63.2664	0.0409156	0.446999	3.21836	220.917	11.294	7.80901	5.92604	2.73564	190.623	4.17159	3.01245	0.899469	2.93754
RS11C	4.05936	6.1901	0.915746	4.21392	0.935194	0.22027	0.88448	0.121449	0.643381	0.114063	0.300899	0.0379489	0.231807	0.0339555	18.9026	0.122234	10.3033	0.04352	47.3336	0.0536003	0.338291	3.40549	142.903	7.08504	4.16059	6.04477	2.5399	183.514	4.44678	3.95144	0.977413	3.22452
RS24A	4.70797	7.5622	1.06255	4.83726	1.00738	0.227578	0.951021	0.131998	0.705591	0.125768	0.336977	0.0425733	0.264864	0.0384093	22.0021	0.084957	13.019	0.0332362	57.4859	0.0497847	0.366599	3.84779	206.756	9.69907	5.12718	6.3877	2.82295	237.879	5.39744	6.16015	1.02519	3.82674
RS24B	5.23586	7.407	1.14913	5.25497	1.05949	0.242982	1.01104	0.137	0.73234	0.132641	0.349621	0.0438086	0.269105	0.0396136	23.0646	0.0876692	77.9026	0.0424117	46.8263	0.0541773	0.456696	4.31888	225.341	15.1062	5.59814	6.67941	3.1084	237.894	5.89298	7.28226	1.08956	4.40754
RS24C	5.79052	9.48483	1.28097	5.64533	1.11131	0.241782	0.988331	0.13336	0.700255	0.122271	0.333319	0.0417891	0.258536	0.0383601	26.171	0.0777794	12.8249	0.0335233	62.4078	0.0467403	0.367541	3.79116	203.25	13.4321	5.66921	7.66516	3.26457	197.165	6.45896	8.12603	1.34659	4.3363
RS25A	4.30182	6.8759	0.980137	4.49861	0.974978	0.225843	0.931876	0.127123	0.67148	0.117532	0.311252	0.0389197	0.235813	0.0343551	20.3256	0.0926055	16.4406	0.033442	48.2054	0.0578179	0.466277	3.78093	254.535	18.0191	7.12882	8.0789	3.38047	231.188	6.6339	6.8792	1.2056	5.43722
RS25B	4.41594	6.96091	0.979514	4.4192	0.9235	0.212351	0.867543	0.118943	0.635297	0.112669	0.301743	0.0383333	0.237402	0.0348607	20.2582	0.071041	11.3729	0.0248532	42.3136	0.0622038	0.35742	3.73143	199.059	9.76635	5.69694	7.41488	2.97023	284.342	6.63248	8.38533	1.21869	5.25336
RS25C	4.3559	6.3657	0.95496	4.3318	0.90686	0.214614	0.875971	0.121702	0.655747	0.11692	0.31501	0.0399628	0.243656	0.035338	19.5341	0.237731	10.276	0.0362736	54.1563	0.0566921	0.406138	4.02756	224.491	12.4746	6.29809	9.01535	3.1003	226.492	5.88403	7.00686	1.20845	4.708
RSLW	4.11812	6.55734	0.914309	4.10657	0.899017	0.212694	0.836088	0.113253	0.577847	0.0990005	0.257373	0.0326701	0.197661	0.0283689	18.9503	0.0717129	13.0775	0.0298391	42.3232	0.0440309	0.340864	3.27495	137.507	10.3246	4.97805	6.10815	2.91645	227.328	5.99547	7.12363	1.18118	5.74983
Note: Concentrations of elements in μg/g. ∑ REEs: Total sum of rare earth elements (REEs).
